# Supplementary material for: Peptide Antibody Reactivity to Homologous Regions in Glutamate Decarboxylase Isoforms and Coxsackievirus B4 P2C
Source: MDPI journal article supplement (doi:10.3390/ijms23084424), 2022-04-17
Supplement: s1 [file s1]

**Immunized peptides:**

GAD67: 258SIMAARYKYFPEVKTGMAAVPKL281

CVB4 P2C: <sup>28</sup>FIEWLKVKILPEVKEKHEFLSRL<sup>50</sup>

### C-terminal truncated peptides

### *N-terminal truncated peptides*

S  
I  
M  
A  
A  
A  
R  
Y  
K  
Y  
F  
P  
E  
V  
K  
T  
K  
G  
M  
A  
A  
A  
V  
P  
K  
L  
  
I  
M  
A  
A  
R  
Y  
K  
Y  
F  
P  
E  
V  
K  
T  
K  
G  
M  
A  
A  
A  
V  
P  
K  
L  
  
M  
A  
A  
R  
Y  
K  
Y  
F  
P  
E  
V  
K  
T  
K  
G  
M  
A  
A  
A  
V  
P  
K  
L  
  
A  
A  
R  
Y  
K  
Y  
F  
P  
E  
V  
K  
T  
K  
G  
M  
A  
A  
A  
V  
P  
K  
L  
  
A  
R  
Y  
K  
Y  
F  
P  
E  
V  
K  
T  
K  
G  
M  
A  
A  
A  
V  
P  
K  
L  
  
R  
Y  
K  
Y  
F  
P  
E  
V  
K  
T  
K  
G  
M  
A  
A  
A  
V  
P  
K  
L  
  
Y  
K  
Y  
F  
P  
E  
V  
K  
T  
K  
G  
M  
A  
A  
A  
V  
P  
K  
L  
  
K  
Y  
F  
P  
E  
V  
K  
T  
K  
G  
M  
A  
A  
A  
V  
P  
K  
L  
  
Y  
F  
P  
E  
V  
K  
T  
K  
G  
M  
A  
A  
A  
V  
P  
K  
L  
  
F  
P  
E  
V  
K  
T  
K  
G  
M  
A  
A  
A  
V  
P  
K  
L  
  
P  
E  
V  
K  
T  
K  
G  
M  
A  
A  
A  
V  
P  
K  
L  
  
E  
V  
K  
T  
K  
G  
M  
A  
A  
A  
V  
P  
K  
L  
  
V  
K  
T  
K  
G  
M  
A  
A  
A  
V  
P  
K  
L  
  
K  
T  
K  
G  
M  
A  
A  
A  
V  
P  
K  
L  
  
T  
K  
G  
M  
A  
A  
A  
V  
P  
K  
L  
  
K  
G  
M  
A  
A  
A  
V  
P  
K  
L  
  
G  
M  
A  
A  
A  
V  
P  
K  
L  
  
M  
A  
A  
V  
P  
K  
L  
  
A  
A  
V  
P  
K  
L

### Truncated peptides

### Alanine-substituted peptides

### Functionality-substituted peptides

RYKYP  
RYKYFP  
RYKYFPE  
ARYKYFPE  
ARYKYFPEV

AYKYFP  
RAKYFP  
RYAYFP  
RYKAFP  
RYKYAP  
RYKYFA

KYKYFP  
RTKYFP  
RYRYFP  
RYKTFP  
RYKYWP

**Peptides used for characterization of SSI-HYB 386-01, 386-02, 387-02, 389-01, 389-02.**

| GAD65 truncated peptides: | GAD67 truncated peptides: | Modified peptides: |
|---------------------------|---------------------------|--------------------|
| PEVKEKGMAALPRL            | EVKTGMAAVPKL              | GMAAA <u>P</u> RL  |
| KEKGMAALPRL               | KTGMAAVPKL                | GMAALP <u>A</u> L  |
| KGMAALPRL                 | GMAAVPKL                  | GMAAVP <u>A</u> L  |
| GMAALPRL                  | AAVPKL                    | AALP <u>A</u> L    |
| AALPRL                    | KTGMAAVPK                 |                    |
